# Supplementary material for: A novel triangular silver nanoprisms-based surface plasmon resonance assay for free chlorine
Source: Royal Society of Chemistry journal article supplement (doi:10.1039/c4an01774a), 2014-11-19
Supplement: c4an01774a1.pdf [file c4an01774a1.pdf]

## **Supporting information**

### **A Novel Triangular Silver Nanoprisms-Based Surface Plasmon Resonance Assay for Free Chlorine**

Yi He\* and Haili Yu

School of National Defence Science & Technology, Southwest University of Science  
and Technology, Mianyang, 621010, P. R. China

\*Corresponding author: Dr. Yi He, Email: [yhe2014@126.com](mailto:yhe2014@126.com).

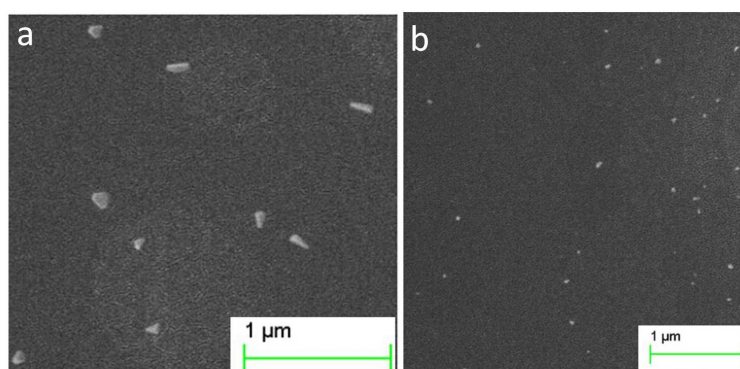

**Fig. S1.** SEM images of triangular silver nanoprisms before (a) and after (b) reaction with free chlorine (20  $\mu\text{M}$ ) for 30 min.

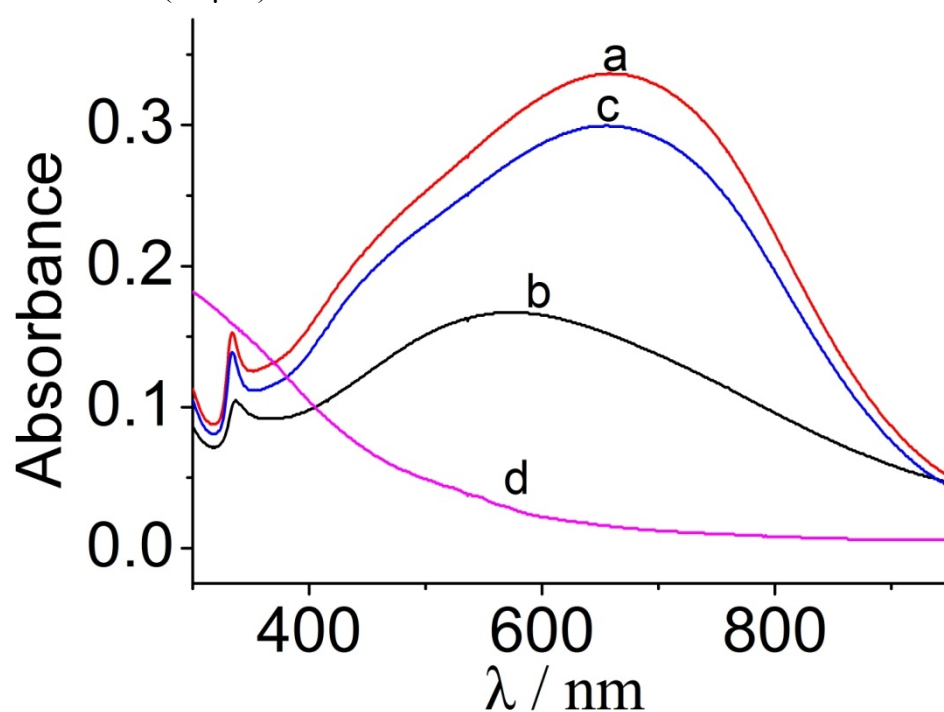

**Fig. S2.** SPR absorption spectra of triangular silver nanoprisms in the absence (a), and the presence of free chlorine (b), hydrogen peroxide (c), and potassium permanganate (d), respectively. ( all at a concentration of 20  $\mu\text{M}$  ).
